# Supplementary material for: A Novel Biclustering Approach to Association Rule Mining for Predicting HIV-1–Human Protein Interactions
Source: PLoS One. 2012 Apr 23;7(4):e32289. doi: 10.1371/journal.pone.0032289 (PMC3335119; doi:10.1371/journal.pone.0032289)
Supplement: File S3 — Excel file containing the interactions predicted from HV matrix, from VH matrix and their union. (XLS) [file pone.0032289.s003.xls]

## Sheet: Predictions from HV matrix
HIV-1 Protein	Human Protein	Confidence
env_gp120	58	0.746667
env_gp120	59	0.746667
env_gp120	60	0.78
env_gp120	70	0.746667
env_gp120	71	0.833333
env_gp120	72	0.746667
env_gp120	81	0.746667
env_gp120	160	0.746667
env_gp120	161	0.746667
env_gp120	163	0.78
env_gp120	164	0.746667
env_gp120	572	0.888889
env_gp120	595	0.78
env_gp120	598	0.888889
env_gp120	801	0.833333
env_gp120	805	0.833333
env_gp120	808	0.833333
env_gp120	841	0.833333
env_gp120	857	0.746667
env_gp120	919	0.78
env_gp120	942	0.833333
env_gp120	1025	0.833333
env_gp120	1173	0.78
env_gp120	1174	0.746667
env_gp120	1175	0.746667
env_gp120	1493	0.833333
env_gp120	1495	0.746667
env_gp120	1991	0.746667
env_gp120	2833	0.78
env_gp120	2885	0.78
env_gp120	3265	0.888889
env_gp120	3266	0.888889
env_gp120	3329	0.746667
env_gp120	3570	0.888889
env_gp120	3659	0.78
env_gp120	3708	0.78
env_gp120	4846	0.746667
env_gp120	5045	0.888889
env_gp120	5058	0.78
env_gp120	5692	0.78
env_gp120	5879	0.78
env_gp120	5880	0.78
env_gp120	6198	0.746667
env_gp120	6648	0.888889
env_gp120	6649	0.888889
env_gp120	6714	0.78
env_gp120	6722	0.746667
env_gp120	7409	0.833333
env_gp120	8905	0.746667
env_gp120	8906	0.746667
env_gp120	8907	0.746667
env_gp120	9138	0.746667
env_gp120	10053	0.746667
env_gp120	10226	0.746667
env_gp120	10488	0.746667
env_gp120	10567	0.746667
env_gp120	10947	0.746667
env_gp120	11282	0.746667
env_gp120	11320	0.746667
env_gp120	23443	0.746667
env_gp120	25834	0.746667
env_gp120	27336	0.78
env_gp120	55170	0.888889
env_gp120	79694	0.746667
integrase	920	0.875
integrase	3439	0.875
integrase	5594	0.875
integrase	5595	0.875
integrase	6303	0.875
integrase	6923	0.875
Tat	164	0.839286
Tat	335	0.78
Tat	718	0.791667
Tat	728	0.78
Tat	801	0.839286
Tat	805	0.839286
Tat	808	0.839286
Tat	834	0.863014
Tat	842	0.888889
Tat	912	0.78
Tat	959	0.78
Tat	965	0.78
Tat	966	0.892857
Tat	1147	0.78
Tat	1174	0.839286
Tat	1432	0.888889
Tat	1493	0.888889
Tat	2208	0.791667
Tat	2534	0.839286
Tat	3055	0.727273
Tat	3440	0.727273
Tat	3444	0.727273
Tat	3449	0.727273
Tat	3551	0.78
Tat	3600	0.892857
Tat	3620	0.863014
Tat	3684	0.78
Tat	4067	0.78
Tat	4734	0.727273
Tat	5339	0.727273
Tat	5478	0.892857
Tat	5894	0.78
Tat	6059	0.727273
Tat	6609	0.78
Tat	6921	0.727273
Tat	7037	0.78
Tat	7150	0.88
Tat	7295	0.78
Tat	7409	0.791667
Tat	7430	0.863014
Tat	7431	0.727273
Tat	7529	0.863014
Tat	7531	0.863014
Tat	8065	0.727273
Tat	8600	0.863014
Tat	8905	0.839286
Tat	8906	0.839286
Tat	8907	0.839286
Tat	9131	0.863014
Tat	9978	0.727273
Tat	10527	0.88
Tat	11262	0.727273
Tat	27035	0.791667
Tat	27350	0.727273
Tat	30835	0.78
Tat	54476	0.727273
Tat	57379	0.727273
Tat	60489	0.88
Tat	83737	0.727273
Vif	142	0.792453
Vif	1915	0.792453
Vif	3837	0.792453
Vif	3842	0.792453
Vif	3843	0.792453
Vif	5371	0.792453
Vif	5591	0.792453
Vif	5888	0.792453
Vif	6598	0.792453
Vif	7520	0.792453
Vif	10575	0.792453

## Sheet: Predictions from VH matrix
HIV-1 Protein	Human Protein	Confidence
Gag_Pr55	920	0.714286
Gag_Pr55	3458	0.857143
Gag_Pr55	5594	0.714286
Nef	3309	0.833333
Nef	54205	0.833333
RT	920	0.714286
RT	4792	0.714286
Rev	71	0.875
Rev	920	0.857143
Rev	3458	0.777778
Vif	836	0.75
Vif	3458	0.714286
Vif	4792	0.75
Vif	5578	0.777778
Vpr	60	0.875
Vpr	5578	0.777778
Vpr	5595	0.9
Vpu	71	0.714286
Vpu	5594	0.857143
capsid	71	0.714286
capsid	5578	0.777778
capsid	5594	0.777778
env_gp120	60	0.777778
env_gp120	71	0.833333
env_gp120	598	0.833333
env_gp160	60	0.777778
env_gp160	71	0.714286
env_gp160	836	0.833333
env_gp160	3586	0.777778
env_gp160	6348	0.857143
env_gp41	596	0.833333
env_gp41	4790	0.857143
env_gp41	4792	0.75
env_gp41	5594	0.777778
matrix	3586	0.777778
matrix	4792	0.714286
nucleocapsid	836	0.857143
nucleocapsid	3458	0.75
nucleocapsid	5578	0.875
p6	3458	0.7
p6	5578	0.777778
retropepsin	920	0.857143
retropepsin	3458	0.777778

## Sheet: All Predictions
HIV-1 Protein	Human Protein (Entrez id)	Human Protein Name	Confidence
capsid	71	ACTG1	0.714286
capsid	5578	PRKCA	0.777778
capsid	5594	MAPK1	0.777778
env_gp120	58	ACTA1	0.746667
env_gp120	59	ACTA2	0.746667
env_gp120	60	ACTB	0.777778
env_gp120	60	ACTB	0.78
env_gp120	70	ACTC1	0.746667
env_gp120	71	ACTG1	0.833333
env_gp120	71	ACTG1	0.833333
env_gp120	72	ACTG2	0.746667
env_gp120	81	ACTN4	0.746667
env_gp120	160	AP2A1	0.746667
env_gp120	161	AP2A2	0.746667
env_gp120	163	AP2B1	0.78
env_gp120	164	AP1G1	0.746667
env_gp120	572	BAD	0.888889
env_gp120	595	CCND1	0.78
env_gp120	598	BCL2L1	0.833333
env_gp120	598	BCL2L1	0.888889
env_gp120	801	CALM1	0.833333
env_gp120	805	CALM2	0.833333
env_gp120	808	CALM3	0.833333
env_gp120	841	CASP8	0.833333
env_gp120	857	CAV1	0.746667
env_gp120	919	CD247	0.78
env_gp120	942	CD86	0.833333
env_gp120	1025	CDK9	0.833333
env_gp120	1173	AP2M1	0.78
env_gp120	1174	AP1S1	0.746667
env_gp120	1175	AP2S1	0.746667
env_gp120	1493	CTLA4	0.833333
env_gp120	1495	CTNNA1	0.746667
env_gp120	1991	ELA2	0.746667
env_gp120	2833	CXCR3	0.78
env_gp120	2885	GRB2	0.78
env_gp120	3265	HRAS	0.888889
env_gp120	3266	ERAS	0.888889
env_gp120	3329	HSPD1	0.746667
env_gp120	3570	IL6R	0.888889
env_gp120	3659	IRF1	0.78
env_gp120	3708	ITPR1	0.78
env_gp120	4846	NOS3	0.746667
env_gp120	5045	FURIN	0.888889
env_gp120	5058	PAK1	0.78
env_gp120	5692	PSMB4	0.78
env_gp120	5879	RAC1	0.78
env_gp120	5880	RAC2	0.78
env_gp120	6198	RPS6KB1	0.746667
env_gp120	6648	SOD2	0.888889
env_gp120	6649	SOD3	0.888889
env_gp120	6714	SRC	0.78
env_gp120	6722	SRF	0.746667
env_gp120	7409	VAV1	0.833333
env_gp120	8905	AP1S2	0.746667
env_gp120	8906	AP1G2	0.746667
env_gp120	8907	AP1M1	0.746667
env_gp120	9138	ARHGEF1	0.746667
env_gp120	10053	AP1M2	0.746667
env_gp120	10226	M6PRBP1	0.746667
env_gp120	10488	CREB3	0.746667
env_gp120	10567	RABAC1	0.746667
env_gp120	10947	AP3M2	0.746667
env_gp120	11282	MGAT4B	0.746667
env_gp120	11320	MGAT4A	0.746667
env_gp120	23443	SLC35A3	0.746667
env_gp120	25834	MGAT4C	0.746667
env_gp120	27336	HTATSF1	0.78
env_gp120	55170	PRMT6	0.888889
env_gp120	79694	MANEA	0.746667
env_gp160	60	ACTB	0.777778
env_gp160	71	ACTG1	0.714286
env_gp160	836	CASP3	0.833333
env_gp160	3586	IL10	0.777778
env_gp160	6348	CCL3	0.857143
env_gp41	596	BCL2	0.833333
env_gp41	4790	NFKB1	0.857143
env_gp41	4792	NFKBIA	0.75
env_gp41	5594	MAPK1	0.777778
Gag_Pr55	920	CD4	0.714286
Gag_Pr55	3458	IFNG	0.857143
Gag_Pr55	5594	MAPK1	0.714286
integrase	920	CD4	0.875
integrase	3439	IFNA1	0.875
integrase	5594	MAPK1	0.875
integrase	5595	MAPK3	0.875
integrase	6303	SAT1	0.875
integrase	6923	TCEB2	0.875
matrix	3586	IL10	0.777778
matrix	4792	NFKBIA	0.714286
Nef	3309	HSPA5	0.833333
Nef	54205	CYCS	0.833333
nucleocapsid	836	CASP3	0.857143
nucleocapsid	3458	IFNG	0.75
nucleocapsid	5578	PRKCA	0.875
p6	3458	IFNG	0.7
p6	5578	PRKCA	0.777778
retropepsin	920	CD4	0.857143
retropepsin	3458	IFNG	0.777778
Rev	71	ACTG1	0.875
Rev	920	CD4	0.857143
Rev	3458	IFNG	0.777778
RT	920	CD4	0.714286
RT	4792	NFKBIA	0.714286
Tat	164	AP1G1	0.839286
Tat	335	APOA1	0.78
Tat	718	C3	0.791667
Tat	728	C5AR1	0.78
Tat	801	CALM1	0.839286
Tat	805	CALM2	0.839286
Tat	808	CALM3	0.839286
Tat	834	CASP1	0.863014
Tat	842	CASP9	0.888889
Tat	912	CD1D	0.78
Tat	959	CD40LG	0.78
Tat	965	CD58	0.78
Tat	966	CD59	0.892857
Tat	1147	CHUK	0.78
Tat	1174	AP1S1	0.839286
Tat	1432	MAPK14	0.888889
Tat	1493	CTLA4	0.888889
Tat	2208	FCER2	0.791667
Tat	2534	FYN	0.839286
Tat	3055	HCK	0.727273
Tat	3440	IFNA2	0.727273
Tat	3444	IFNA7	0.727273
Tat	3449	IFNA16	0.727273
Tat	3551	IKBKB	0.78
Tat	3600	IL15	0.892857
Tat	3620	INDO	0.863014
Tat	3684	ITGAM	0.78
Tat	4067	LYN	0.78
Tat	4734	NEDD4	0.727273
Tat	5339	PLEC1	0.727273
Tat	5478	PPIA	0.892857
Tat	5894	RAF1	0.78
Tat	6059	ABCE1	0.727273
Tat	6609	SMPD1	0.78
Tat	6921	TCEB1	0.727273
Tat	7037	TFRC	0.78
Tat	7150	TOP1	0.88
Tat	7295	TXN	0.78
Tat	7409	VAV1	0.791667
Tat	7430	EZR	0.863014
Tat	7431	VIM	0.727273
Tat	7529	YWHAB	0.863014
Tat	7531	YWHAE	0.863014
Tat	8065	CUL5	0.727273
Tat	8600	TNFSF11	0.863014
Tat	8905	AP1S2	0.839286
Tat	8906	AP1G2	0.839286
Tat	8907	AP1M1	0.839286
Tat	9131	AIFM1	0.863014
Tat	9978	RBX1	0.727273
Tat	10527	IPO7	0.88
Tat	11262	SP140	0.727273
Tat	27035	NOX1	0.791667
Tat	27350	APOBEC3C	0.727273
Tat	30835	CD209	0.78
Tat	54476	RNF216	0.727273
Tat	57379	AICDA	0.727273
Tat	60489	APOBEC3G	0.88
Tat	83737	ITCH	0.727273
Vif	142	PARP1	0.792453
Vif	836	CASP3	0.75
Vif	1915	EEF1A1	0.792453
Vif	3458	IFNG	0.714286
Vif	3837	KPNB1	0.792453
Vif	3842	TNPO1	0.792453
Vif	3843	RANBP5	0.792453
Vif	4792	NFKBIA	0.75
Vif	5371	PML	0.792453
Vif	5578	PRKCA	0.777778
Vif	5591	PRKDC	0.792453
Vif	5888	RAD51	0.792453
Vif	6598	SMARCB1	0.792453
Vif	7520	XRCC5	0.792453
Vif	10575	CCT4	0.792453
Vpr	60	ACTB	0.875
Vpr	5578	PRKCA	0.777778
Vpr	5595	MAPK3	0.9
Vpu	71	ACTG1	0.714286
Vpu	5594	MAPK1	0.857143
